# Supplementary material
Source: publisher site journal article supplement (https://www.dovepress.com/article/558158)
Supplement: Supplementary file 1 [file merged%20pdf.pdf]

**Supplementary Material 1**  
**Single-best answer questions used in the virtual finals mock examination**

**Question 1**

A 63-year-old woman comes to the GP because of pruritus for several months. A DXA scan is performed and confirms her to be osteoporotic. She also reports that she has been fatigued but attributes this to her age. Physical examination shows yellow-tinged sclera but is otherwise normal. Investigations show an increased conjugated bilirubin, but all other blood tests are normal.

**Which of the following is the most likely underlying diagnosis?**

- a) Primary Biliary Cholangitis
- b) Vitamin D deficiency
- c) Autoimmune hepatitis
- d) Cushing's syndrome
- e) Primary hyperparathyroidism

**Correct answer = a) Primary Biliary Cholangitis**

**Question 2**

A 20-year-old man presents to the emergency department because of fever and altered mental status. On examination, there is a petechial rash on his trunk and arms and a positive Kernig sign. The cerebrospinal fluid is cultured and shows evidence of gram-negative diplococci. Two hours later he becomes hypotensive, and fluid resuscitation does not improve his blood pressure. Investigations show evidence of a severe hyponatraemia with a mild hyperkalaemia. The patient now complains of generalised abdominal tenderness.

**Which of the following is likely to be seen in this patient?**

- a) Increased fibrinogen
- b) Increased renin
- c) Increased cortisol
- d) Increased oestrogen
- e) Metabolic alkalosis

**Correct answer = b) Increased renin**

**Question 3**

A 65-year-old man presents because of weakness over the past couple of weeks. The weakness is greatest in the mornings, and when it happens, he feels that he cannot move his arms or keep his head up. However, as the day goes on, he finds that his strength increases. He also reports a dry mouth, constipation and a cough that is sometimes blood streaked. He is a long-time smoker.

**What is the likely underlying cause of the patient's symptoms?**

- a) Syndrome of Inappropriate ADH Secretion
- b) Dermatomyositis
- c) Polymyalgia Rheumatica
- d) Small Cell Lung Cancer
- e) Motor Neuron Disease

**Correct answer = d) Small Cell Lung Cancer**

**Question 4**

A 40-year-old woman presents with a four-week history of severe epigastric pain, urinary frequency and greasy stools. She has a history of recurrent kidney stones. Investigations show elevated gastrin levels. An endoscopy shows multiple duodenal ulcers.

**Which of the following additional findings would likely be seen in this patient?**

- a) Arachnodactyly
- b) Amenorrhoea
- c) Hypertensive Crisis
- d) Firm Thyroid Nodule
- e) Skin Flushing

**Correct answer = b) Amenorrhoea**

**Question 5**

A 40-year-old woman presents to the breast clinic with a self-palpated breast mass. A fine-needle aspiration is performed and the test result returns as negative. When you explain the test result to the patient, the patient asks, "What are the chances that I really don't have breast cancer?"

**Which of the values best addresses the patient's question?**

- a) Sensitivity
- b) Specificity
- c) Positive Predictive Value
- d) Negative Predictive Value
- e) T-test

**Correct answer = d) Negative Predictive Value**

**Question 6**

A 67-year-old female presents to her GP for a medication review. She has been otherwise well for the past 6 months and has a past medical history of osteoarthritis and breast cancer. She currently takes over the counter paracetamol. Her observations are all normal apart from her blood pressure which is 169/102 mmHg on first reading and confirmed on ambulatory blood pressure monitoring as 161/99mmHg on average. She has previously struggled to tolerate lisinopril.

**What would be the most appropriate management of her blood pressure?**

- a) Candesartan
- b) Bisoprolol
- c) Amlodipine
- d) Ramipril
- e) Lifestyle interventions only

**Correct answer = c) Amlodipine**

**Question 7**

A 34-year-old man is brought by ambulance to the emergency department following a road traffic accident. He has a Glasgow Coma Scale score of 8 and is unable to provide a history. On examination: his breathing is noisy, his trachea is deviated to the left, hyper-resonance on percussion of the right side of the chest and reduced chest expansion on the right side of the chest. His oxygen saturation is 90% on room air.

**Which of the following is the most appropriate next step in management?**

- a) Admit for 24 Hours with High-Flow Oxygen
- b) Airway Manoeuvres
- c) Insert Chest Drain
- d) Chest X-Ray
- e) Emergency Needle Decompression

**Correct answer = b) Airway Manoeuvres**

### **Question 8**

A 44-year-old woman is receiving a blood transfusion prior to a hysterectomy. She had severe uterine bleeding and iron deficiency anaemia. Thirty minutes after the transfusion starts, she develops severe flank pain and chills.

Her observations are:

Temperature: 39.1 °C

Respiratory rate: 21/min

Heart rate: 120/min

Blood pressure: 133/80 mmHg

The transfusion is stopped, but she continues to complain of symptoms and begins to bleed from her catheter site.

**What is the likely cause of her symptoms?**

- a) Febrile Non-Haemolytic Transfusion Reaction
- b) Anaphylaxis
- c) Transfusion-Associated Circulatory Overload
- d) Delayed Haemolytic Transfusion Reaction
- e) Acute Haemolytic Transfusion Reaction

**Correct answer = e) Acute Haemolytic Transfusion Reaction**

### **Question 9**

A 35-year-old woman presents with a 5-month history of irregular menstrual cycles. Menses occur at irregular 18 to 45-day intervals. She also has a history of a milky discharge from her nipples for the past two months. She also complains of joint and muscle pain. She has gained 2 kg in weight recently. She has a history of hypothyroidism and schizophrenia which is managed by levothyroxine and aripiprazole respectively. There are no remarkable examination findings. Blood tests show a normal morning cortisol, mildly elevated prolactin level and a high thyroid stimulating hormone level (TSH).

**What is the likely cause of her nipple discharge?**

- a) Cushing disease
- b) Aripiprazole use
- c) Hypothyroidism
- d) Prolactinoma
- e) Physiological pituitary enlargement

**Correct answer = c) Hypothyroidism**

### **Question 10**

A 64-year-old man presents to the emergency department with intermittent bloody vomiting for the past 3 hours. He drinks half a litre of vodka daily. On examination, there are prominent umbilical blood vessels, palmar erythema and evidence of shifting dullness. Intravenous fluids, blood transfusions and Terlipressin have all been given. An endoscopy has been organised within 24 hours.

**Which of the following is the most appropriate next step?**

- a) Refer for Transjugular Intrahepatic Portosystemic Shunt
- b) Give propranolol
- c) Give intravenous antibiotics
- d) Insert balloon tamponade
- e) Give a proton pump inhibitor

**Correct answer = c) Give intravenous antibiotics**

### **Question 11**

A 64-year-old man presents with worsening dyspnoea upon exertion over the past 6 months. The patient also has a dry cough. On auscultation, crackles are heard bilaterally at the base of each lung. He recently started bleomycin to treat his non-Hodgkin's lymphoma.

**In addition to a reduced forced expiratory volume in 1 second (FEV1), which of the following results is most likely to be expected in his pulmonary function testing?**

- a) Decreased Forced Vital Capacity (FVC), Decreased FEV1/FVC Ratio, Decreased Total Lung Capacity
- b) Decreased Forced Vital Capacity (FVC), Decreased FEV1/FVC Ratio, Normal Total Lung Capacity
- c) Decreased Forced Vital Capacity (FVC), Increased FEV1/FVC Ratio, Decreased Total Lung Capacity
- d) Normal Forced Vital Capacity (FVC), Decreased FEV1/FVC Ratio, Normal Total Lung Capacity
- e) Normal Forced Vital Capacity (FVC), Normal FEV1/FVC Ratio, Increased Total Lung Capacity

**Correct answer = c) Decreased Forced Vital Capacity (FVC), Increased FEV1/FVC Ratio, Decreased Total Lung Capacity**

### **Question 12**

A 43-year-old woman is brought to the emergency department after she was found lying on the pavement mumbling to herself. She is lethargic and nauseous. She has a past medical history of systemic lupus erythematosus and has not been compliant with her medications. On examination, she is confused and only oriented to person. There is jugular venous distension and bilateral pitting oedema in both ankles. On examination, she has a pericardial rub. An ECG shows widespread ST elevation.

Blood tests show the following:

pH: 7.28 (7.35-7.45)

Na: 141 mmol/L (135-145)

K: 5.8 mmol/L (3.5-5.5)

Urea: 27 mmol/L (2.5-6.7)

Creatinine: 410 µmol/L (70-150), baseline - 100

**What is the most important next step?**

- a) Give lactulose
- b) Haemodialysis
- c) Give methotrexate
- d) Give IV bicarbonate
- e) Give insulin & dextrose

**Correct answer = b) Haemodialysis**

### **Question 13**

A 62-year-old man presents to the emergency department with a dry cough and severe chest pain. He had an inferior wall myocardial infarction two months ago treated with stents. On examination, a high-pitched scratching sound is heard. This sound is loudest during expiration when the patient is sitting upright. An ECG shows diffuse ST elevations. The troponin levels are elevated.

**What is the likely diagnosis?**

- a) Cardiac Tamponade
- b) Dressler's Syndrome
- c) Constrictive Pericarditis
- d) Myocardial Infarction
- e) Early infarct-associated pericarditis

**Correct answer = b) Dressler's Syndrome**

**Question 14**

A 64-year-old man is brought to the emergency department because of high fever and confusion. He has also had a two-day history of a productive cough with green sputum. He has smoked a pack of cigarettes daily for the past 25 years. His BMI is 30. His anterior cervical lymph nodes are enlarged and not painful. On examination, there is a palpable liver edge and spleen tip. A chest x-ray shows evidence of consolidation in the right lower lobe. His full blood count is shown below. Haemoglobin – 11 g/dL (13.0 - 17.0) Platelets – 120 x 10<sup>9</sup> g/dL (150 - 400) Lymphocytes – 43 x 10<sup>9</sup> g/dL (1.5 - 4) Blood cultures, antibiotics and supportive care have been given.

**What is the most appropriate next step?**

- a) Flow cytometry
- b) Bronchoscopy
- c) JAK-2 mutation testing
- d) Lymph node biopsy
- e) Epstein-Barr virus serology

**Correct answer = b) Flow cytometry**

**Question 15**

A 55-year-old man comes to the emergency department with a gunshot wound to the abdomen. His wife says that he was getting dressed when his loaded handgun fell from the top shelf and unloaded one round when it struck the floor. His heart rate is 132/min and blood pressure is 64/43 mmHg. His skin is clammy and cool to touch with dry mucous membranes. A catheter is inserted and renal casts are found in the collection bag.

**Which type of renal cast is likely to be seen on urinalysis?**

- a) Muddy brown casts
- b) Hyaline casts
- c) Red blood cell casts
- d) Waxy casts
- e) White blood cell casts

**Correct answer = a) Muddy brown casts**

**Question 16**

A 43-year-old man presents to the GP with a 2-month history of exertional dyspnoea and is easily fatigued. He recently became a vegan. He takes sertraline to manage his depression. He also takes isoniazid for latent tuberculosis for the past 4 months. On examination, there is evidence of conjunctival pallor and his tongue looks shiny. There is evidence of hypopigmentation on his hands. There is no splenomegaly.

Haemoglobin – 10 g/dL (13.0 - 17.0)  
Mean Cell Volume – 110 fL (80 – 96)  
Lymphocytes –  $4 \times 10^9$  g/dL (1.5 – 4)

**What is the likely cause of his symptoms?**

- a) Isoniazid use
- b) Myelodysplasia
- c) Deficiency of dietary vitamin B12
- d) Chronic Myeloid Leukaemia
- e) Pernicious anaemia

**Correct answer = e) Pernicious anaemia**

**Question 17**

A 69-year-old man with type 2 diabetes and heart failure presents for a routine follow-up. His only medications are metformin and ramipril. At the time of diagnosis, his HbA1c was 67 mmol/mol. His HbA1c is now 59 mmol/mol. His BMI is 31 kg/m<sup>2</sup> and he has struggled to lose weight through lifestyle measures.

Which of the following is the most appropriate next step to manage his hyperglycaemia?

- a) Switch Metformin to Modified Release
- b) Add Sitagliptin
- c) Increase dose of Metformin
- d) Add Insulin
- e) Add Pioglitazone

**Correct answer = b) Add Sitagliptin**

**Question 18**

A 54-year-old man presents to the GP with a 5- month history of progressively worsening chest pain after meals. This pain occurs daily and is worse after eating spicy food. There is no history of weight loss. He has a 35-year smoking history. A upper GI endoscopy is performed and shows evidence of erythema of the distal oesophagus. A biopsy is performed which showed no evidence of metaplasia.

**Without treatment, which of the following complications is this patient at greatest risk of?**

- a) Oesophageal Adenocarcinoma
- b) Oesophageal Squamous Cell Carcinoma
- c) Hiatal Hernia
- d) Oesophageal Stricture
- e) Gastric Cancer

**Correct answer = d) Oesophageal Stricture**

**Question 19**

A 79-year-old man is admitted to hospital with a two-week history of worsening shortness of breath. On admission, he is breathless at rest and unable to mobilise. He has a past medical history of Type 2 Diabetes Mellitus and Heart Failure. On examination: his jugular venous pressure is elevated, an S3 sound is heard on auscultation, crackles are heard bilaterally and there is bilateral ankle oedema. He currently takes ramipril, metformin, spironolactone, atorvastatin, furosemide and a GTN spray. An up-to-date echocardiogram shows a left ventricular ejection fraction of 24%. An ECG shows a normal sinus rhythm and narrow QRS complexes. He is stabilised in hospital after treatment with IV furosemide.

**What is the single most likely intervention to further reduce his risk of mortality?**

- a) Implanted cardioverter defibrillator
- b) Heart transplantation
- c) Cardiac resynchronisation therapy
- d) Permanent pacemaker
- e) Left ventricular assist device

**Correct answer = a) Implanted cardioverter defibrillator**

### **Question 20**

A 35-year-old woman presents to the emergency department complaining of sudden onset vision loss in her right eye. She reports two days of increasing fatigue, and mild pain around her right eye, which is worse with eye movement. 2 months ago she also had a short episode of being “unsteady on her feet” which resolved on its own after about 3 days. Visual examination shows her visual acuity is 20/20 in her left eye and 20/200 in her right eye. There is an adduction deficit in the right eye and nystagmus in the left eye when looking left. There is also a relative afferent pupillary defect in the right eye.

**What is the likely cause of the rapid afferent pupillary defect in this patient?**

- a) Demyelination of the left medial longitudinal fasciculus
- b) Demyelination of the right medial longitudinal fasciculus
- c) Disruption in optic nerve blood supply
- d) Increased intracranial pressure
- e) Optic nerve inflammation

**Correct answer = e) Optic nerve inflammation**

### **Question 21**

A 3-year-old boy is brought to the GP by his mother with bone pain and difficulty walking for the past month. On examination, there is a soft skull with frontal bossing, bumps along the costochondral junction, short stature, and bowing of the legs. Xrays show epiphyseal widening. His mother says that the child has been exclusively breastfed.

**Which of the following describes the most likely blood test findings?**

- a) Low Calcium, high Phosphate, high PTH, and high ALP
- b) High Calcium, low Phosphate, high PTH, and high ALP
- c) Low Calcium, low Phosphate, high PTH, and high ALP
- d) High Calcium, high Phosphate, low PTH, and normal ALP
- e) Normal Calcium, normal Phosphate, normal PTH, and high ALP

**Correct answer = c) Low Calcium, low Phosphate, high PTH, and high ALP**

### **Question 22**

A 33-year-old woman comes to the GP because of back pain for 6 years. She describes pain from her neck to tailbone. It is worse at night, sometimes even waking her from sleep. The pain improves with exercise. She also mentions having intermittent pain at the elbows, wrist and ankles. On examination, there are restricted movements of the lumbar spine, reduced chest expansion and she was tender at the sacroiliac joints.

**Which of the following is least likely to be seen in this patient?**

- a) Sacroiliitis
- b) HLA B-27 positive
- c) Elevated CRP
- d) Elevated ESR
- e) Anti-CCP positive

**Correct answer = e) Anti-CCP positive**

### **Question 23**

A 33-year-old woman is brought to the emergency department due to tonic-clonic seizures. Review of the medical record indicates that she has schizophrenia but stopped taking all her medications two weeks ago. Her observations are normal and physical examination is unremarkable.

Sodium = 120 mmol/L

Potassium = 4 mmol/L

Serum osmolality = 250 mmol/kg

Urine osmolality = 80 mmol/kg

The urine osmolality increases after fluid deprivation studies.

**What is the likely cause of her electrolyte abnormalities?**

- a) Primary polydipsia
- b) Central Diabetes Insipidus
- c) Nephrogenic Diabetes Insipidus
- d) Syndrome of Inappropriate ADH Secretion
- e) Adrenal insufficiency

**Correct answer = a) Primary polydipsia**

### **Question 24**

A 45-year-old woman, with a history of asthma, presents to the emergency department because of chest palpitations. The palpitations started one hour ago. The symptoms began while she was drinking an energy drink. There was no evidence of peripheral oedema and jugular venous distention. Her blood pressure is normal but her pulse is 155/min. The symptoms do not improve after vagal manoeuvres. She does not report any chest pain or syncope. The ECG showed a regular rhythm with narrow QRS complexes and no discernible p waves.

**What is the most appropriate next step?**

- a) Administer IV Verapamil
- b) Administer IV Adenosine
- c) Synchronised DC Cardioversion
- d) Perform catheter ablation
- e) Administer IV Bisoprolol

**Correct answer = a) Administer IV Verapamil**

### **Question 25**

A 50-year-old cook presents to the neurology clinic with a history of dropping pans. He has not travelled recently and reports no recent illness. He takes frequent breaks because he feels his legs are weaker than they should be. He has a past medical history of type 2 diabetes mellitus, which is complicated by pre-proliferative retinopathy and proteinuria. On examination, there is weakness in both lower limbs, more marked on the right than the left, and diminished lower limb reflexes. There is weakness in both hands, with an increased biceps reflex bilaterally. There is loss of vibration sense and pinprick sensation from the toes to the knees bilaterally.

**What is the likely cause of her weakness?**

- a) Amyotrophic Lateral Sclerosis
- b) Myasthenia Gravis
- c) Charcot-Marie-Tooth Disease
- d) Syringomyelia
- e) Guillain-Barré Syndrome

**Correct answer = a) Amyotrophic Lateral Sclerosis**

**Question 26**

A 35-year old woman has hepatitis B serological tests performed.

Here results are described below:

HBsAg: Negative

Anti-HBs: Positive

Anti-HBc: Negative

HBeAg: Negative

Anti-HBe: Negative

**How should the findings of the test be reported?**

- a) Acute Hepatitis B Infection
- b) Chronic Hepatitis B Infection
- c) Resolved Hepatitis B Infection
- d) Vaccination Against Hepatitis B Infection
- e) Window period of infection

**Correct answer = d) Vaccination Against Hepatitis B Infection**

**Question 27**

A 50-year-old woman is brought to the emergency department because of convulsions. 30 minutes ago, paramedics found her convulsing on the ground. The paramedics gave 1 dose of 10mg buccal midazolam, which successfully stopped the convulsions, but she has not regained consciousness. On examination, there is weakness of the right side of the patient's body. Before the examination is finished, the patient begins to exhibit another convulsive attack.

An arterial blood gas is performed and shown below:

pH – 7.28

pO<sub>2</sub> – 60kPa

pCO<sub>2</sub> – 5kPa

HCO<sub>3</sub> – 18mmol/L

Lactate – 12 mmol/L

**What is the most appropriate initial therapy for this patient?**

- a) IV Lorazepam
- b) IV Sodium Valproate
- c) IV Phenytoin
- d) Rapid sequence intubation
- e) IV Phenobarbital

**Correct answer = a) IV Lorazepam**

### **Question 28**

A male newborn is delivered at term to a 36-year-old woman. The baby is significant overweight. Significant lateral neck flexion is required during delivery. At rest, his right shoulder is adducted and internally rotated. The baby cries with passive movement of the arm. The baby's glucose levels also appear low.

**Which of the following in the mother is most likely to have caused this infant's condition?**

- a) Folate deficiency during pregnancy
- b) Listeria monocytogenes infection
- c) Gestational diabetes
- d) Rubella infection
- e) Syphilis infection

**Correct answer = c) Gestational diabetes**

### **Question 29**

A 60-year-old woman presents with a two-week history of heartburn. The pain most often appears as she lies down to sleep. She also frequently wakes up with burning in her throat and epigastric area. She sometimes has an unpleasant bile taste in her mouth. She states that she has recently been having difficulty swallowing in addition to her usual symptoms. She has a past medical history of hypothyroidism.

**What is the most appropriate next step?**

- a) Advise lifestyle changes
- b) Endoscopy
- c) Proton pump inhibitor
- d) Check anti-parietal cell antibodies
- e) Nissen fundoplication

**Correct answer = b) Endoscopy**

### **Question 30**

A 39-year-old woman presents with a three-month history of reduced libido and hirsutism. On examination, there is evidence of central obesity, acne, striae and easily bruisable skin. There is skin fullness at the dorsum of the neck. A 24-hour urinary-free cortisol is elevated and an 8am ACTH is high. The cortisol levels are suppressed after a high-dose dexamethasone suppression test.

**What is the most appropriate next step?**

- a) Inferior petrosal vein sampling
- b) MRI Pituitary
- c) CT Thorax
- d) CT Adrenals
- e) Chest X-ray

**Correct answer = b) MRI Pituitary**

| Timestamp         | Are you currently a student | Year of Medical School | How would you rate your |
|-------------------|-----------------------------|------------------------|-------------------------|
| 2/6/2022 17:16:39 | Yes                         | Year 4                 | 8                       |
| 2/6/2022 17:16:40 | No                          | Year 5                 | 8                       |
| 2/6/2022 17:16:43 | No                          | Year 4                 | 3                       |
| 2/6/2022 17:16:46 | Yes                         | Year 3                 | 4                       |
| 2/6/2022 17:16:47 | No                          | Year 5                 | 6                       |
| 2/6/2022 17:16:47 | No                          | Year 5                 | 8                       |
| 2/6/2022 17:16:49 | Yes                         | Year 4                 | 7                       |
| 2/6/2022 17:16:50 | No                          | Year 4                 | 4                       |
| 2/6/2022 17:16:51 | No                          | Year 5                 | 10                      |
| 2/6/2022 17:16:52 | No                          | Year 6                 | 6                       |
| 2/6/2022 17:16:53 | No                          | Year 5                 | 5                       |
| 2/6/2022 17:16:53 | No                          | Year 4                 | 3                       |
| 2/6/2022 17:16:55 | Yes                         | Year 4                 | 5                       |
| 2/6/2022 17:16:59 | No                          | Year 5                 | 5                       |
| 2/6/2022 17:17:01 | No                          | Year 6                 | 6                       |
| 2/6/2022 17:17:03 | No                          | Year 6                 | 5                       |
| 2/6/2022 17:17:03 | No                          | Year 5                 | 4                       |
| 2/6/2022 17:17:04 | No                          | Year 5                 | 5                       |
| 2/6/2022 17:17:06 | No                          | Year 6                 | 7                       |
| 2/6/2022 17:17:09 | No                          | Year 5                 | 3                       |
| 2/6/2022 17:17:11 | No                          | Year 4                 | 1                       |
| 2/6/2022 17:17:13 | No                          | Year 6                 | 5                       |
| 2/6/2022 17:17:13 | Yes                         | Year 3                 | 5                       |
| 2/6/2022 17:17:14 | No                          | Year 6                 | 6                       |
| 2/6/2022 17:17:14 | No                          | Year 2                 | 6                       |
| 2/6/2022 17:17:20 | No                          | Year 5                 | 7                       |
| 2/6/2022 17:17:24 | No                          | Year 4                 | 5                       |
| 2/6/2022 17:17:26 | No                          | Year 3                 | 5                       |
| 2/6/2022 17:17:28 | Yes                         | Year 4                 | 7                       |
| 2/6/2022 17:17:30 | No                          | Year 4                 | 4                       |
| 2/6/2022 17:17:32 | No                          | Year 5                 | 6                       |
| 2/6/2022 17:17:34 | No                          | Year 5                 | 6                       |
| 2/6/2022 17:17:38 | No                          | Year 5                 | 6                       |
| 2/6/2022 17:17:39 | No                          | Year 5                 | 3                       |
| 2/6/2022 17:17:40 | No                          | Year 4                 | 4                       |
| 2/6/2022 17:17:41 | No                          | Year 5                 | 4                       |
| 2/6/2022 17:17:41 | Yes                         | Year 3                 | 3                       |
| 2/6/2022 17:17:41 | No                          | Year 5                 | 4                       |
| 2/6/2022 17:17:43 | No                          | Year 6                 | 6                       |
| 2/6/2022 17:17:48 | No                          | Year 3                 | 5                       |
| 2/6/2022 17:17:48 | No                          | Year 4                 | 7                       |
| 2/6/2022 17:17:49 | No                          | Year 4                 | 5                       |
| 2/6/2022 17:17:50 | No                          | Year 5                 | 7                       |
| 2/6/2022 17:17:50 | No                          | Year 5                 | 10                      |
| 2/6/2022 17:17:53 | No                          | Year 4                 | 6                       |
| 2/6/2022 17:17:53 | No                          | Year 5                 | 5                       |
| 2/6/2022 17:17:54 | Yes                         | Year 4                 | 1                       |

|                       |        |    |
|-----------------------|--------|----|
| 2/6/2022 17:17:54 No  | Year 5 | 5  |
| 2/6/2022 17:17:58 Yes | Year 3 | 6  |
| 2/6/2022 17:17:59 No  | Year 5 | 3  |
| 2/6/2022 17:18:02 No  | Year 6 | 5  |
| 2/6/2022 17:18:05 No  | Year 5 | 5  |
| 2/6/2022 17:18:06 No  | Year 3 | 6  |
| 2/6/2022 17:18:09 No  | Year 5 | 6  |
| 2/6/2022 17:18:14 No  | Year 4 | 4  |
| 2/6/2022 17:18:16 No  | Year 6 | 7  |
| 2/6/2022 17:18:21 Yes | Year 2 | 1  |
| 2/6/2022 17:18:23 Yes | Year 4 | 5  |
| 2/6/2022 17:18:26 Yes | Year 5 | 7  |
| 2/6/2022 17:18:28 Yes | Year 3 | 5  |
| 2/6/2022 17:18:30 Yes | Year 3 | 7  |
| 2/6/2022 17:18:40 No  | Year 3 | 4  |
| 2/6/2022 17:18:42 No  | Year 5 | 6  |
| 2/6/2022 17:18:42 No  | Year 4 | 2  |
| 2/6/2022 17:18:46 No  | Year 4 | 4  |
| 2/6/2022 17:18:47 No  | Year 6 | 8  |
| 2/6/2022 17:18:50 No  | Year 5 | 5  |
| 2/6/2022 17:18:51 No  | Year 6 | 4  |
| 2/6/2022 17:18:52 No  | Year 5 | 4  |
| 2/6/2022 17:18:53 No  | Year 5 | 8  |
| 2/6/2022 17:18:53 Yes | Year 6 | 5  |
| 2/6/2022 17:18:53 No  | Year 5 | 5  |
| 2/6/2022 17:19:00 No  | Year 6 | 6  |
| 2/6/2022 17:19:00 No  | Year 6 | 7  |
| 2/6/2022 17:19:03 No  | Year 3 | 1  |
| 2/6/2022 17:19:06 No  | Year 6 | 7  |
| 2/6/2022 17:19:07 No  | Year 5 | 7  |
| 2/6/2022 17:19:21 Yes | Year 2 | 3  |
| 2/6/2022 17:19:32 No  | Year 5 | 4  |
| 2/6/2022 17:19:37 No  | Year 4 | 6  |
| 2/6/2022 17:19:41 No  | Year 4 | 6  |
| 2/6/2022 17:19:47 No  | Year 5 | 5  |
| 2/6/2022 17:19:49 No  | Year 4 | 8  |
| 2/6/2022 17:19:58 No  | Year 4 | 6  |
| 2/6/2022 17:19:58 No  | Year 6 | 3  |
| 2/6/2022 17:19:59 No  | Year 5 | 4  |
| 2/6/2022 17:20:06 No  | Year 5 | 2  |
| 2/6/2022 17:20:16 No  | Year 4 | 3  |
| 2/6/2022 17:20:16 No  | Year 4 | 7  |
| 2/6/2022 17:20:19 No  | Year 4 | 5  |
| 2/6/2022 17:20:27 No  | Year 5 | 1  |
| 2/6/2022 17:20:35 No  | Year 4 | 8  |
| 2/6/2022 17:20:42 No  | Year 4 | 5  |
| 2/6/2022 17:21:26 No  | Year 3 | 3  |
| 2/6/2022 17:21:32 No  | Year 5 | 3  |
| 2/6/2022 17:21:35 No  | Year 6 | 4  |
| 2/6/2022 17:21:41 No  | Year 5 | 9  |
| 2/6/2022 17:21:45 No  | Year 5 | 5  |
| 2/6/2022 17:21:49 No  | Year 6 | 5  |
| 2/6/2022 17:21:57 No  | Year 5 | 6  |
| 2/6/2022 17:22:09 Yes | Year 3 | 4  |
| 2/6/2022 17:22:24 No  | Year 4 | 6  |
| 2/6/2022 17:22:31 No  | Year 4 | 10 |
| 2/6/2022 17:22:40 No  | Year 4 | 3  |
| 2/6/2022 17:22:51 No  | Year 5 | 9  |
| 2/6/2022 17:22:55 Yes | Year 3 | 3  |

|                       |        |    |
|-----------------------|--------|----|
| 2/6/2022 17:22:58 No  | Year 5 | 5  |
| 2/6/2022 17:23:00 No  | Year 4 | 3  |
| 2/6/2022 17:23:17 No  | Year 6 | 5  |
| 2/6/2022 17:23:25 No  | Year 4 | 3  |
| 2/6/2022 17:23:25 No  | Year 4 | 3  |
| 2/6/2022 17:23:25 No  | Year 5 | 6  |
| 2/6/2022 17:23:30 Yes | Year 3 | 5  |
| 2/6/2022 17:23:36 No  | Year 5 | 5  |
| 2/6/2022 17:23:52 No  | Year 6 | 4  |
| 2/6/2022 17:24:27 No  | Year 4 | 5  |
| 2/6/2022 17:24:31 Yes | Year 4 | 5  |
| 2/6/2022 17:25:26 No  | Year 4 | 6  |
| 2/6/2022 17:25:39 No  | Year 4 | 5  |
| 2/6/2022 17:25:52 No  | Year 5 | 2  |
| 2/6/2022 17:26:39 No  | Year 4 | 6  |
| 2/6/2022 17:27:25 No  | Year 5 | 3  |
| 2/6/2022 17:27:41 No  | Year 5 | 5  |
| 2/6/2022 17:28:01 No  | Year 6 | 5  |
| 2/6/2022 17:28:33 Yes | Year 3 | 1  |
| 2/6/2022 17:28:42 No  | Year 5 | 4  |
| 2/6/2022 17:28:50 No  | Year 5 | 6  |
| 2/6/2022 17:28:56 No  | Year 5 | 4  |
| 2/6/2022 17:29:02 Yes | Year 4 | 5  |
| 2/6/2022 17:29:26 No  | Year 6 | 6  |
| 2/6/2022 17:29:27 No  | Year 4 | 3  |
| 2/6/2022 17:29:41 No  | Year 4 | 4  |
| 2/6/2022 17:29:46 No  | Year 6 | 5  |
| 2/6/2022 17:29:50 No  | Year 6 | 5  |
| 2/6/2022 17:30:01 No  | Year 5 | 4  |
| 2/6/2022 17:30:16 No  | Year 5 | 9  |
| 2/6/2022 17:30:27 Yes | Year 4 | 7  |
| 2/6/2022 17:30:31 No  | Year 4 | 6  |
| 2/6/2022 17:30:33 No  | Year 4 | 8  |
| 2/6/2022 17:30:39 No  | Year 4 | 4  |
| 2/6/2022 17:30:40 No  | Year 4 | 10 |
| 2/6/2022 17:30:41 No  | Year 5 | 2  |
| 2/6/2022 17:30:46 No  | Year 5 | 5  |
| 2/6/2022 17:31:00 No  | Year 4 | 5  |
| 2/6/2022 17:31:00 No  | Year 5 | 5  |
| 2/6/2022 17:31:21 No  | Year 5 | 6  |
| 2/6/2022 17:31:22 No  | Year 5 | 5  |
| 2/6/2022 17:31:49 No  | Year 4 | 5  |
| 2/6/2022 17:32:01 No  | Year 6 | 8  |
| 2/6/2022 17:33:50 No  | Year 4 | 7  |
| 2/6/2022 17:33:58 No  | Year 4 | 4  |
| 2/6/2022 17:34:42 No  | Year 6 | 4  |
| 2/6/2022 17:35:12 No  | Year 5 | 5  |
| 2/6/2022 17:35:57 Yes | Year 4 | 7  |
| 2/6/2022 17:36:52 No  | Year 4 | 4  |
| 2/6/2022 17:37:25 No  | Year 5 | 5  |
| 2/6/2022 17:37:27 No  | Year 4 | 6  |
| 2/6/2022 17:37:27 No  | Year 4 | 9  |
| 2/6/2022 17:37:53 No  | Year 5 | 6  |
| 2/6/2022 17:37:56 No  | Year 5 | 5  |
| 2/6/2022 17:38:10 Yes | Year 3 | 3  |
| 2/6/2022 17:38:47 No  | Year 5 | 6  |
| 2/6/2022 17:38:50 No  | Year 6 | 5  |
| 2/6/2022 17:39:14 Yes | Year 3 | 3  |
| 2/6/2022 17:39:47 No  | Year 5 | 5  |

|                       |        |   |
|-----------------------|--------|---|
| 2/6/2022 17:40:03 No  | Year 4 | 5 |
| 2/6/2022 17:40:20 No  | Year 5 | 5 |
| 2/6/2022 17:40:38 No  | Year 4 | 3 |
| 2/6/2022 17:41:54 No  | Year 5 | 9 |
| 2/6/2022 17:41:59 No  | Year 4 | 4 |
| 2/6/2022 17:42:41 No  | Year 6 | 5 |
| 2/6/2022 17:43:14 No  | Year 5 | 6 |
| 2/6/2022 17:44:33 No  | Year 6 | 6 |
| 2/6/2022 17:45:37 No  | Year 5 | 5 |
| 2/6/2022 17:46:06 No  | Year 4 | 5 |
| 2/6/2022 17:53:36 Yes | Year 3 | 4 |
| 2/6/2022 17:55:18 No  | Year 5 | 4 |
| 2/6/2022 17:55:20 Yes | Year 3 | 4 |
| 2/6/2022 18:03:41 No  | Year 5 | 6 |
| 2/6/2022 18:10:22 Yes | Year 4 | 7 |
| 2/6/2022 18:12:12 No  | Year 5 | 6 |
| 2/6/2022 18:12:26 Yes | Year 3 | 2 |
| 2/6/2022 18:18:46 No  | Year 4 | 5 |
| 2/6/2022 18:20:32 No  | Year 5 | 8 |
| 2/6/2022 18:33:31 Yes | Year 4 | 2 |
| 2/6/2022 18:34:17 No  | Year 4 | 8 |
| 2/6/2022 18:39:15 Yes | Year 4 | 5 |
| 2/6/2022 18:58:46 Yes | Year 4 | 8 |
| 2/6/2022 19:10:58 No  | Year 4 | 7 |
| 2/6/2022 19:10:59 No  | Year 5 | 7 |
| 2/6/2022 19:12:59 No  | Year 4 | 6 |
| 2/6/2022 19:14:10 No  | Year 5 | 1 |
| 2/6/2022 20:06:52 Yes | Year 3 | 2 |
| 2/6/2022 20:40:29 No  | Year 5 | 7 |
| 2/7/2022 13:23:32 No  | Year 5 | 6 |
| 2/7/2022 15:17:48 No  | Year 4 | 6 |
| 2/14/2022 15:46:32 No | Year 5 | 5 |
| 2/15/2022 5:23:30 No  | Year 3 | 3 |

How would you rate you To what extent do you : Please rate your anxiet Please rate your anxiet

|    |    |    |    |
|----|----|----|----|
| 5  | 8  | 7  | 10 |
| 6  | 8  | 5  | 8  |
| 5  | 10 | 6  | 8  |
| 2  | 6  | 6  | 10 |
| 7  | 8  | 7  | 8  |
| 9  | 10 | 2  | 1  |
| 8  | 9  | 10 | 9  |
| 6  | 6  | 8  | 7  |
| 10 | 10 | 10 | 10 |
| 6  | 6  | 6  | 6  |
| 5  | 6  | 8  | 8  |
| 2  | 7  | 5  | 8  |
| 4  | 10 | 5  | 8  |
| 8  | 7  | 1  | 5  |
| 8  | 7  | 9  | 7  |
| 3  | 7  | 10 | 10 |
| 5  | 10 | 10 | 8  |
| 7  | 10 | 9  | 8  |
| 7  | 6  | 6  | 6  |
| 5  | 7  | 9  | 9  |
| 3  | 5  | 7  | 7  |
| 6  | 8  | 9  | 8  |
| 4  | 8  | 10 | 9  |
| 8  | 8  | 6  | 6  |
| 7  | 8  | 9  | 4  |
| 7  | 9  | 9  | 9  |
| 6  | 7  | 9  | 9  |
| 7  | 10 | 1  | 1  |
| 8  | 9  | 8  | 8  |
| 8  | 10 | 10 | 10 |
| 7  | 10 | 6  | 7  |
| 4  | 7  | 7  | 8  |
| 6  | 6  | 6  | 8  |
| 9  | 10 | 10 | 4  |
| 6  | 9  | 6  | 6  |
| 4  | 10 | 8  | 10 |
| 2  | 9  | 10 | 9  |
| 5  | 7  | 5  | 7  |
| 7  | 10 | 10 | 9  |
| 4  | 7  | 6  | 5  |
| 6  | 10 | 7  | 7  |
| 7  | 8  | 6  | 5  |
| 6  | 8  | 8  | 9  |
| 3  | 7  | 9  | 10 |
| 6  | 6  | 6  | 5  |
| 3  | 2  | 6  | 9  |
| 3  | 6  | 8  | 10 |

|    |    |    |    |
|----|----|----|----|
| 5  | 7  | 7  | 7  |
| 7  | 8  | 6  | 4  |
| 2  | 6  | 5  | 9  |
| 7  | 8  | 10 | 8  |
| 6  | 8  | 8  | 10 |
| 4  | 9  | 9  | 10 |
| 8  | 10 | 8  | 7  |
| 2  | 7  | 8  | 10 |
| 8  | 9  | 6  | 4  |
| 2  | 4  | 9  | 9  |
| 8  | 7  | 7  | 6  |
| 10 | 8  | 1  | 1  |
| 7  | 10 | 6  | 4  |
| 7  | 10 | 8  | 7  |
| 5  | 7  | 7  | 7  |
| 7  | 7  | 7  | 7  |
| 3  | 6  | 10 | 9  |
| 2  | 5  | 10 | 10 |
| 8  | 6  | 4  | 4  |
| 8  | 8  | 6  | 10 |
| 2  | 3  | 8  | 10 |
| 2  | 7  | 3  | 9  |
| 1  | 2  | 2  | 10 |
| 4  | 7  | 8  | 9  |
| 5  | 8  | 9  | 9  |
| 6  | 8  | 10 | 10 |
| 7  | 10 | 6  | 6  |
| 3  | 7  | 10 | 10 |
| 8  | 9  | 6  | 5  |
| 6  | 8  | 5  | 5  |
| 3  | 7  | 8  | 5  |
| 5  | 8  | 10 | 9  |
| 4  | 8  | 8  | 8  |
| 7  | 8  | 8  | 6  |
| 6  | 10 | 7  | 6  |
| 6  | 6  | 8  | 10 |
| 3  | 9  | 9  | 10 |
| 5  | 10 | 6  | 9  |
| 7  | 7  | 9  | 7  |
| 4  | 7  | 8  | 9  |
| 5  | 8  | 9  | 7  |
| 2  | 6  | 2  | 9  |
| 5  | 7  | 10 | 10 |
| 5  | 7  | 8  | 6  |
| 8  | 9  | 4  | 3  |
| 8  | 10 | 8  | 6  |
| 3  | 4  | 6  | 7  |
| 2  | 7  | 10 | 7  |
| 5  | 8  | 8  | 8  |
| 5  | 9  | 6  | 10 |
| 7  | 9  | 2  | 2  |
| 7  | 10 | 9  | 9  |
| 4  | 7  | 6  | 9  |
| 6  | 10 | 8  | 6  |
| 3  | 8  | 5  | 8  |
| 10 | 10 | 10 | 10 |
| 5  | 8  | 10 | 10 |
| 6  | 10 | 5  | 5  |
| 6  | 10 | 4  | 6  |

|    |    |    |    |
|----|----|----|----|
| 5  | 7  | 7  | 9  |
| 4  | 5  | 8  | 8  |
| 7  | 8  | 4  | 6  |
| 5  | 8  | 9  | 7  |
| 1  | 8  | 8  | 10 |
| 8  | 8  | 9  | 9  |
| 7  | 7  | 5  | 7  |
| 7  | 10 | 9  | 10 |
| 7  | 10 | 9  | 6  |
| 7  | 9  | 7  | 6  |
| 7  | 7  | 5  | 6  |
| 7  | 7  | 8  | 8  |
| 7  | 7  | 8  | 8  |
| 3  | 6  | 7  | 7  |
| 7  | 7  | 6  | 5  |
| 7  | 8  | 3  | 7  |
| 7  | 8  | 5  | 5  |
| 6  | 7  | 8  | 9  |
| 1  | 7  | 7  | 9  |
| 6  | 9  | 8  | 6  |
| 5  | 9  | 6  | 7  |
| 3  | 6  | 8  | 9  |
| 3  | 4  | 5  | 7  |
| 7  | 10 | 8  | 8  |
| 5  | 8  | 9  | 8  |
| 7  | 8  | 10 | 10 |
| 7  | 10 | 7  | 9  |
| 6  | 7  | 6  | 6  |
| 3  | 8  | 10 | 10 |
| 5  | 8  | 10 | 10 |
| 8  | 10 | 6  | 7  |
| 7  | 10 | 7  | 6  |
| 6  | 6  | 4  | 9  |
| 4  | 7  | 10 | 4  |
| 10 | 10 | 10 | 10 |
| 3  | 4  | 10 | 10 |
| 6  | 10 | 5  | 7  |
| 5  | 10 | 8  | 8  |
| 5  | 10 | 7  | 8  |
| 6  | 5  | 2  | 2  |
| 7  | 10 | 3  | 3  |
| 8  | 10 | 1  | 1  |
| 8  | 9  | 8  | 8  |
| 9  | 10 | 2  | 1  |
| 6  | 8  | 10 | 10 |
| 7  | 7  | 7  | 7  |
| 3  | 6  | 6  | 6  |
| 6  | 8  | 7  | 7  |
| 5  | 6  | 1  | 1  |
| 6  | 9  | 8  | 8  |
| 7  | 9  | 5  | 7  |
| 10 | 10 | 10 | 10 |
| 6  | 6  | 8  | 9  |
| 6  | 8  | 9  | 5  |
| 5  | 8  | 7  | 6  |
| 7  | 10 | 9  | 6  |
| 7  | 8  | 5  | 4  |
| 5  | 10 | 7  | 8  |
| 6  | 6  | 9  | 8  |

6  
5  
4  
1  
5  
6  
6  
8  
5  
6  
4  
8  
5  
9  
4  
6  
7  
7  
7  
5  
2  
6  
6  
6  
4  
5  
2  
4  
8  
7  
7  
7  
4

8  
7  
8  
1  
7  
8  
6  
9  
6  
8  
9  
6  
10  
5  
8  
8  
10  
9  
10  
5  
8  
8  
10  
6  
9  
6  
9  
9  
5  
8  
10

8  
8  
10  
2  
5  
10  
6  
10  
5  
1  
8  
9  
10  
10  
6  
6  
9  
10  
8  
10  
5  
7  
8  
10  
5  
10  
9  
9  
6  
7  
5  
5  
8

8  
8  
10  
10  
6  
9  
6  
7  
5  
1  
9  
8  
10  
7  
9  
6  
5  
9  
9  
7  
10  
7  
10  
10  
8  
10  
10  
8  
8  
7  
5  
6  
8

To what extent do you : To what extent do you : To what extent do you : To what extent do you :

|    |    |    |    |
|----|----|----|----|
| 10 | 10 | 7  | 10 |
| 8  | 8  | 7  | 7  |
| 10 | 10 | 10 | 10 |
| 6  | 6  | 4  | 4  |
| 9  | 9  | 8  | 9  |
| 10 | 10 | 10 | 10 |
| 10 | 10 | 8  | 8  |
| 8  | 8  | 6  | 5  |
| 10 | 10 | 10 | 10 |
| 6  | 6  | 6  | 6  |
| 7  | 7  | 5  | 5  |
| 8  | 8  | 5  | 9  |
| 10 | 10 | 10 | 10 |
| 10 | 10 | 4  | 8  |
| 10 | 10 | 4  | 5  |
| 10 | 10 | 7  | 10 |
| 10 | 10 | 10 | 10 |
| 10 | 10 | 10 | 10 |
| 7  | 7  | 5  | 6  |
| 6  | 6  | 6  | 6  |
| 7  | 6  | 6  | 6  |
| 10 | 10 | 6  | 7  |
| 8  | 7  | 8  | 8  |
| 8  | 8  | 8  | 8  |
| 10 | 10 | 9  | 9  |
| 10 | 10 | 10 | 3  |
| 9  | 7  | 4  | 7  |
| 10 | 6  | 8  | 9  |
| 10 | 9  | 8  | 8  |
| 10 | 10 | 10 | 10 |
| 10 | 10 | 9  | 10 |
| 10 | 10 | 10 | 10 |
| 6  | 10 | 9  | 7  |
| 10 | 10 | 7  | 7  |
| 10 | 10 | 7  | 7  |
| 10 | 10 | 10 | 8  |
| 10 | 10 | 9  | 10 |
| 7  | 7  | 4  | 6  |
| 10 | 10 | 10 | 10 |
| 7  | 10 | 8  | 6  |
| 10 | 10 | 5  | 10 |
| 10 | 10 | 10 | 9  |
| 9  | 9  | 5  | 8  |
| 10 | 10 | 1  | 10 |
| 9  | 9  | 6  | 8  |
| 6  | 6  | 1  | 8  |
| 10 | 10 | 2  | 4  |

7  
10  
5  
10  
10  
10  
10  
10  
9  
10  
9  
10  
10  
10  
10  
9  
10  
10  
8  
10  
7  
8  
5  
8  
10  
10  
10  
10  
10  
10  
9  
9  
10  
10  
10  
10  
5  
10  
10  
9  
10  
8  
9  
8  
10  
9  
10  
7  
10  
8  
10  
10  
10  
10  
10  
10  
9  
10  
10  
10  
10

7  
10  
5  
10  
9  
2  
10  
8  
9  
10  
9  
10  
10  
10  
10  
9  
10  
10  
8  
10  
5  
5  
8  
10  
10  
10  
10  
10  
9  
9  
10  
10  
9  
10  
7  
10  
10  
9  
10  
7  
10  
7  
10  
10  
10  
10  
10  
10  
9  
10  
10  
10  
10

6  
9  
6  
10  
9  
10  
10  
8  
7  
9  
7  
10  
9  
10  
9  
8  
5  
5  
3  
2  
6  
3  
5  
10  
8  
7  
8  
7  
7  
8  
8  
8  
10  
3  
10  
10  
7  
7  
7  
1  
7  
8  
6  
10  
2  
8  
4  
5  
7  
8  
5  
7  
6  
10  
8  
10  
10

6  
9  
5  
10  
10  
10  
10  
10  
10  
8  
7  
10  
8  
7  
10  
8  
9  
9  
7  
2  
6  
7  
10  
10  
8  
10  
8  
7  
6  
9  
4  
10  
9  
10  
8  
7  
8  
9  
9  
10  
8  
9  
10  
2  
10  
8  
5  
9  
9  
10  
5  
7  
10  
8  
10  
10

9  
5  
9  
10  
10  
10  
10  
10  
10  
10  
9  
8  
10  
10  
8  
10  
10  
7  
10  
5  
10  
7  
9  
5  
9  
9  
10  
10  
8  
8  
9  
10  
10  
10  
10  
10  
10  
9  
10  
10  
10  
10  
5  
10  
10  
7  
10  
10  
7  
6  
9  
10  
10  
10  
9  
8  
8  
8  
10  
10  
10  
9

9  
5  
9  
10  
10  
10  
10  
10  
10  
9  
5  
5  
10  
8  
10  
7  
10  
5  
10  
10  
9  
5  
9  
9  
10  
8  
8  
9  
10  
10  
10  
8  
10  
9  
10  
10  
5  
10  
10  
9  
10  
10  
7  
6  
8  
9  
10  
10  
10  
8  
8  
8  
10  
9  
10  
9

9  
5  
9  
8  
5  
9  
10  
10  
6  
5  
3  
8  
8  
8  
7  
4  
3  
8  
8  
7  
6  
2  
6  
8  
7  
8  
6  
6  
1  
7  
7  
6  
10  
10  
8  
7  
10  
6  
5  
10  
10  
6  
10  
8  
7  
6  
8  
9  
9  
10  
8  
7  
8  
6  
8  
5  
8  
8

8  
8  
9  
6  
10  
9  
10  
10  
10  
7  
9  
7  
9  
9  
8  
10  
10  
10  
9  
3  
8  
2  
5  
5  
10  
7  
4  
8  
9  
10  
10  
9  
2  
10  
10  
10  
10  
9  
10  
8  
4  
7  
10  
7  
8  
9  
6  
10  
10  
7  
8  
5  
10  
8  
10  
7

10  
10  
10  
7  
9  
8  
6  
10  
10  
9  
10  
5  
10  
10  
9  
8  
8  
10  
9  
10  
8  
8  
9  
10  
7  
10  
6  
8  
9  
9  
9  
8  
10

7  
10  
10  
5  
8  
9  
6  
10  
10  
9  
10  
6  
10  
10  
9  
5  
9  
10  
9  
10  
8  
8  
9  
10  
7  
10  
6  
5  
9  
9  
9  
9  
10

7  
8  
7  
1  
6  
5  
6  
10  
6  
8  
7  
7  
5  
10  
1  
5  
6  
8  
9  
10  
3  
7  
2  
6  
2  
4  
4  
5  
9  
8  
9  
8  
8

6  
9  
10  
7  
7  
7  
6  
10  
3  
7  
10  
7  
4  
10  
8  
6  
9  
8  
9  
10  
9  
8  
7  
10  
8  
10  
7  
10  
9  
10  
7  
8  
8

| What is your ideal num | What is your ideal num | What is your ideal num | To what extent do you : |
|------------------------|------------------------|------------------------|-------------------------|
|                        | 90 seconds             |                        | 10                      |
| < 90 seconds           | 90 seconds             | > 90 seconds           | 6                       |
| 90 seconds             |                        |                        | 10                      |
|                        | < 90 seconds           |                        | 10                      |
| > 90 seconds           | 90 seconds             | < 90 seconds           | 9                       |
|                        |                        | 90 seconds             | 10                      |
|                        | < 90 seconds           |                        | 10                      |
|                        | 90 seconds             |                        | 6                       |
|                        | 90 seconds             |                        | 10                      |
| < 90 seconds           |                        |                        | 6                       |
| < 90 seconds           |                        |                        | 5                       |
|                        | 90 seconds             |                        | 10                      |
|                        | > 90 seconds           |                        | 10                      |
|                        |                        | 90 seconds             | 8                       |
|                        |                        | < 90 seconds           | 6                       |
|                        | 90 seconds             |                        | 10                      |
|                        |                        | 90 seconds             | 8                       |
|                        |                        | < 90 seconds           | 10                      |
| < 90 seconds           |                        |                        | 7                       |
|                        | 90 seconds             |                        | 6                       |
|                        | 90 seconds             |                        | 8                       |
| < 90 seconds           | 90 seconds             | > 90 seconds           | 9                       |
|                        | 90 seconds             |                        | 7                       |
| < 90 seconds           |                        |                        | 7                       |
|                        | 90 seconds             |                        | 9                       |
|                        |                        | < 90 seconds           | 7                       |
|                        |                        | 90 seconds             | 6                       |
|                        |                        | 90 seconds             | 8                       |
|                        | 90 seconds             |                        | 9                       |
|                        | 90 seconds             |                        | 10                      |
|                        |                        | < 90 seconds           | 10                      |
|                        | 90 seconds             |                        | 10                      |
|                        |                        | 90 seconds             | 10                      |
|                        |                        | 90 seconds             | 10                      |
|                        |                        | > 90 seconds           | 10                      |
|                        | 90 seconds             |                        | 10                      |
|                        | 90 seconds             |                        | 6                       |
|                        | 90 seconds             |                        | 10                      |
|                        | 90 seconds             |                        | 8                       |
|                        |                        | < 90 seconds, 90 secur | 10                      |
|                        | 90 seconds             |                        | 9                       |
| < 90 seconds           | 90 seconds             | > 90 seconds           | 9                       |
|                        |                        | 90 seconds             | 10                      |
|                        |                        | 90 seconds             | 7                       |
|                        | 90 seconds             |                        | 4                       |
| 90 seconds             |                        |                        | 2                       |

|              |              |                         |    |
|--------------|--------------|-------------------------|----|
|              | 90 seconds   |                         | 8  |
|              | 90 seconds   |                         | 8  |
| 90 seconds   |              | 90 seconds              | 5  |
|              |              |                         | 10 |
|              | 90 seconds   |                         | 10 |
|              | < 90 seconds |                         | 8  |
|              | 90 seconds   |                         | 8  |
|              | 90 seconds   |                         | 9  |
|              | 90 seconds   |                         | 10 |
|              |              | > 90 seconds            | 2  |
| 90 seconds   | 90 seconds   |                         | 9  |
|              |              |                         | 10 |
|              |              | 90 seconds              | 10 |
|              | > 90 seconds |                         | 10 |
|              | 90 seconds   |                         | 10 |
|              | 90 seconds   |                         | 10 |
| > 90 seconds |              | < 90 seconds            | 7  |
|              | 90 seconds   | < 90 seconds            | 10 |
|              | 90 seconds   |                         | 9  |
|              |              | < 90 seconds            | 10 |
|              | 90 seconds   |                         | 9  |
|              |              | < 90 seconds            | 9  |
|              |              | 90 seconds              | 7  |
| < 90 seconds | 90 seconds   |                         | 7  |
|              | 90 seconds   | > 90 seconds            | 9  |
|              | 90 seconds   |                         | 10 |
| < 90 seconds | 90 seconds   | > 90 seconds            | 7  |
|              |              | 90 seconds              | 8  |
|              |              | < 90 seconds, 90 second | 10 |
|              |              | < 90 seconds            | 4  |
| < 90 seconds | 90 seconds   | > 90 seconds            | 9  |
|              |              | 90 seconds              | 9  |
|              | 90 seconds   |                         | 10 |
| 90 seconds   |              | > 90 seconds            | 10 |
|              |              |                         | 10 |
|              | 90 seconds   |                         | 10 |
|              |              | 90 seconds              | 9  |
|              |              | < 90 seconds            | 10 |
|              |              | 90 seconds              | 8  |
|              | 90 seconds   |                         | 10 |
| < 90 seconds |              | 90 seconds              | 7  |
| 90 seconds   | 90 seconds   | > 90 seconds            | 6  |
|              |              |                         | 9  |
|              | 90 seconds   |                         | 10 |
|              |              | 90 seconds              | 10 |
| > 90 seconds | 90 seconds   |                         | 10 |
|              |              |                         | 4  |
|              | 90 seconds   |                         | 10 |
|              | 90 seconds   |                         | 9  |
|              |              | > 90 seconds            | 10 |
|              | 90 seconds   |                         | 10 |
|              |              | < 90 seconds            | 10 |
|              | 90 seconds   |                         | 10 |
| < 90 seconds |              | < 90 seconds            | 10 |
|              | 90 seconds   | > 90 seconds            | 9  |
| < 90 seconds | 90 seconds   | > 90 seconds            | 10 |
|              |              | < 90 seconds            | 9  |
|              | 90 seconds   |                         | 10 |
|              |              | 90 seconds              | 10 |

|              |              |                        |    |
|--------------|--------------|------------------------|----|
|              |              | < 90 seconds           | 8  |
|              |              | < 90 seconds           | 4  |
| > 90 seconds | 90 seconds   |                        | 8  |
|              | 90 seconds   | < 90 seconds           | 10 |
|              | 90 seconds   |                        | 10 |
|              | 90 seconds   |                        | 9  |
| < 90 seconds | 90 seconds   |                        | 9  |
| < 90 seconds | 90 seconds   | > 90 seconds           | 10 |
|              | < 90 seconds |                        | 6  |
|              | 90 seconds   |                        | 9  |
|              | 90 seconds   |                        | 9  |
|              | 90 seconds   |                        | 8  |
|              | 90 seconds   |                        | 8  |
| 90 seconds   |              |                        | 8  |
|              | 90 seconds   |                        | 8  |
| < 90 seconds |              |                        | 10 |
|              | 90 seconds   |                        | 10 |
|              | 90 seconds   |                        | 10 |
|              | 90 seconds   |                        | 7  |
| < 90 seconds |              | 90 seconds             | 4  |
|              | < 90 seconds |                        | 8  |
| > 90 seconds |              |                        | 9  |
|              |              | 90 seconds             | 9  |
|              | 90 seconds   |                        | 10 |
|              | 90 seconds   |                        | 10 |
|              | 90 seconds   |                        | 10 |
|              |              | < 90 seconds, 90 secor | 10 |
|              | 90 seconds   |                        | 3  |
|              | 90 seconds   |                        | 10 |
|              | 90 seconds   |                        | 10 |
|              | 90 seconds   |                        | 10 |
| < 90 seconds | 90 seconds   | > 90 seconds           | 8  |
|              | < 90 seconds |                        | 10 |
|              | < 90 seconds |                        | 10 |
|              |              | > 90 seconds           | 10 |
|              |              | 90 seconds             | 9  |
| < 90 seconds | 90 seconds   | > 90 seconds           | 10 |
|              | 90 seconds   |                        | 10 |
|              | 90 seconds   | 90 seconds             | 10 |
|              |              |                        | 8  |
|              |              | 90 seconds             | 3  |
|              |              | > 90 seconds           | 10 |
|              |              | > 90 seconds           | 7  |
|              |              | < 90 seconds           | 10 |
| < 90 seconds |              |                        | 10 |
|              | 90 seconds   |                        | 8  |
|              | 90 seconds   |                        | 7  |
|              | 90 seconds   |                        | 8  |
|              | 90 seconds   |                        | 6  |
|              | < 90 seconds |                        | 10 |
|              | 90 seconds   |                        | 6  |
|              | 90 seconds   |                        | 9  |
| < 90 seconds |              |                        | 7  |
|              |              | 90 seconds             | 9  |
|              |              | 90 seconds             | 8  |
|              | 90 seconds   |                        | 10 |
|              |              | 90 seconds, > 90 secor | 8  |
|              |              | 90 seconds             | 10 |
|              | 90 seconds   |                        | 4  |

|              |              |              |    |
|--------------|--------------|--------------|----|
|              | < 90 seconds |              | 10 |
|              | 90 seconds   |              | 10 |
| < 90 seconds | 90 seconds   | > 90 seconds | 9  |
|              |              | < 90 seconds | 8  |
|              | 90 seconds   |              | 7  |
|              |              | < 90 seconds | 10 |
|              |              |              | 5  |
|              |              | < 90 seconds | 10 |
| 90 seconds   | > 90 seconds | < 90 seconds | 10 |
|              | 90 seconds   |              | 6  |
|              | 90 seconds   |              | 10 |
| < 90 seconds | > 90 seconds | 90 seconds   | 9  |
| < 90 seconds | 90 seconds   | > 90 seconds | 8  |
|              | 90 seconds   |              | 10 |
|              | 90 seconds   |              | 9  |
|              | < 90 seconds |              | 4  |
|              | 90 seconds   |              | 10 |
|              | 90 seconds   |              | 8  |
|              | < 90 seconds |              | 9  |
|              | 90 seconds   |              | 10 |
|              | > 90 seconds |              | 6  |
|              | 90 seconds   |              | 10 |
| 90 seconds   |              |              | 10 |
|              | 90 seconds   |              | 10 |
|              | < 90 seconds |              | 6  |
|              | 90 seconds   |              | 10 |
|              | 90 seconds   |              | 3  |
| 90 seconds   |              |              | 9  |
| 90 seconds   | < 90 seconds |              | 7  |
|              | 90 seconds   |              | 10 |
| > 90 seconds |              |              | 5  |
| < 90 seconds | 90 seconds   | > 90 seconds | 8  |
|              | 90 seconds   |              | 9  |

In your opinion, which c To what extent do you : To what extent do you agree with this statemen

|              |    |    |
|--------------|----|----|
| Kahoot       | 5  | 9  |
| Zoom polling | 1  | 1  |
| Vevox        | 10 | 1  |
| Kahoot       | 2  | 2  |
| Vevox        | 8  | 9  |
| Vevox        | 10 | 10 |
| Vevox        | 10 | 10 |
| Vevox        | 1  | 1  |
| Vevox        | 10 | 10 |
| Vevox        | 6  | 6  |
| Vevox        | 4  | 3  |
| Vevox        | 2  | 1  |
| Kahoot       | 10 | 10 |
| Vevox        | 5  | 3  |
| Mentimeter   | 4  | 7  |
| Mentimeter   | 10 | 3  |
| Zoom polling | 10 | 10 |
| Vevox        | 5  | 5  |
| Mentimeter   | 6  | 5  |
| Vevox        | 4  | 7  |
| Vevox        | 7  | 6  |
| Vevox        | 8  | 5  |
| Vevox        | 5  | 6  |
| Zoom polling | 7  | 7  |
| Zoom polling | 9  | 6  |
| Kahoot       | 10 | 10 |
| Vevox        | 5  | 2  |
| Vevox        | 10 | 8  |
| Vevox        | 8  | 2  |
| Vevox        | 10 | 1  |
| Vevox        | 9  | 4  |
| Mentimeter   | 10 | 2  |
| Vevox        | 3  | 1  |
| Vevox        | 4  | 1  |
| Vevox        | 7  | 1  |
| Vevox        | 10 | 10 |
| Vevox        | 4  | 5  |
| Zoom polling | 3  | 4  |
| Vevox        | 6  | 6  |
| Vevox        | 7  | 7  |
| Vevox        | 5  | 8  |
| Kahoot       | 6  | 9  |
| Vevox        | 8  | 7  |
| Vevox        | 1  | 1  |
| Vevox        | 5  | 5  |
| Mentimeter   | 3  | 1  |
| Slido        | 1  | 1  |

|                        |    |    |
|------------------------|----|----|
| Vevox                  | 7  | 7  |
| Kahoot                 | 7  | 8  |
| Kahoot                 | 6  | 8  |
| Mentimeter             | 8  | 4  |
| Vevox                  | 10 | 10 |
| Kahoot                 | 9  | 1  |
| Mentimeter             | 10 | 5  |
| Kahoot                 | 1  | 5  |
| Vevox                  | 5  | 7  |
| Mentimeter             | 2  | 9  |
| Vevox                  | 8  | 8  |
| Mentimeter             | 10 | 10 |
| Vevox                  | 10 | 10 |
| Vevox                  | 8  | 8  |
| Vevox                  | 5  | 5  |
| Vevox                  | 8  | 8  |
| Zoom polling           | 5  | 1  |
| Vevox                  | 10 | 10 |
| Vevox                  | 8  | 7  |
| Vevox                  | 1  | 10 |
| Vevox                  | 5  | 1  |
| Vevox                  | 7  | 1  |
| Kahoot                 | 1  | 1  |
| Zoom polling           | 8  | 9  |
| Mentimeter             | 3  | 2  |
| Vevox                  | 7  | 3  |
| Mentimeter             | 6  | 6  |
| Vevox                  | 8  | 5  |
| Kahoot                 | 4  | 6  |
| Something where the ti | 3  | 4  |
| Vevox                  | 6  | 1  |
| Not sure               | 9  | 2  |
| Vevox                  | 9  | 5  |
| Vevox                  | 10 | 10 |
| Vevox                  | 9  | 1  |
| Vevox                  | 9  | 9  |
| Zoom polling           | 10 | 10 |
| Vevox                  | 5  | 10 |
| Mentimeter             | 7  | 4  |
| Vevox                  | 8  | 7  |
| Vevox                  | 5  | 5  |
| Kahoot                 | 9  | 9  |
| Zoom polling           | 5  | 1  |
| Vevox                  | 5  | 5  |
| Vevox                  | 9  | 3  |
| Vevox and slido are go | 6  | 7  |
| Zoom polling           | 3  | 3  |
| Slido                  | 7  | 5  |
| Vevox                  | 8  | 2  |
| Vevox                  | 10 | 5  |
| Vevox                  | 10 | 5  |
| Vevox                  | 10 | 2  |
| Vevox                  | 5  | 5  |
| Vevox                  | 7  | 5  |
| Vevox                  | 9  | 2  |
| Vevox                  | 10 | 10 |
| Vevox                  | 6  | 2  |
| Vevox                  | 10 | 10 |
| Vevox                  | 10 | 5  |

|                        |    |    |
|------------------------|----|----|
| Zoom polling           | 3  | 3  |
| Zoom polling           | 3  | 2  |
| Vevox                  | 9  | 8  |
| Vevox                  | 10 | 10 |
| Vevox                  | 2  | 5  |
| Vevox                  | 9  | 9  |
| Vevox                  | 9  | 10 |
| Vevox                  | 10 | 10 |
| Mentimeter             | 1  | 1  |
| Vevox                  | 10 | 7  |
| Vevox                  | 10 | 8  |
| Vevox                  | 6  | 5  |
| Vevox                  | 8  | 6  |
| Vevox                  | 7  | 3  |
| Mentimeter             | 8  | 10 |
| Kahoot                 | 6  | 7  |
| Vevox                  | 9  | 6  |
| Vevox                  | 10 | 1  |
| Vevox                  | 5  | 5  |
| Writing answers on you | 10 | 2  |
| Vevox                  | 7  | 1  |
| Vevox                  | 5  | 1  |
| Vevox                  | 1  | 1  |
| Vevox                  | 8  | 2  |
| Vevox                  | 5  | 7  |
| Vevox                  | 5  | 2  |
| Vevox                  | 10 | 10 |
| Zoom polling           | 7  | 8  |
| Vevox                  | 5  | 2  |
| Vevox                  | 6  | 1  |
| Vevox                  | 10 | 10 |
| Zoom polling           | 9  | 8  |
| Vevox                  | 8  | 1  |
| Vevox                  | 4  | 4  |
| Zoom polling           | 10 | 10 |
| Vevox                  | 8  | 7  |
| Vevox                  | 10 | 10 |
| Vevox                  | 1  | 1  |
| Vevox                  | 7  | 7  |
| Vevox                  | 7  | 7  |
| Mentimeter             | 5  | 2  |
| Vevox                  | 10 | 1  |
| Kahoot                 | 8  | 7  |
| Vevox                  | 10 | 10 |
| Vevox                  | 8  | 1  |
| Zoom polling           | 8  | 8  |
| Vevox                  | 6  | 8  |
| Vevox                  | 5  | 7  |
| Kahoot                 | 7  | 10 |
| Vevox                  | 7  | 10 |
| Kahoot                 | 6  | 10 |
| Vevox                  | 6  | 10 |
| Vevox                  | 1  | 1  |
| Vevox                  | 4  | 4  |
| Vevox                  | 4  | 3  |
| Vevox                  | 10 | 1  |
| Mentimeter             | 6  | 9  |
| Vevox                  | 10 | 3  |
| Kahoot                 | 7  | 1  |

|              |    |    |
|--------------|----|----|
| Vevox        | 5  | 5  |
| Vevox        | 5  | 2  |
| Vevox        | 4  | 1  |
| Mentimeter   | 1  | 1  |
| Vevox        | 7  | 5  |
| Vevox        | 1  | 1  |
| Mentimeter   | 6  | 6  |
| Vevox        | 10 | 10 |
| Zoom polling | 3  | 3  |
| Kahoot       | 7  | 8  |
| Vevox        | 5  | 5  |
| Vevox        | 7  | 9  |
| Vevox        | 5  | 5  |
| Vevox        | 10 | 10 |
| Vevox        | 1  | 1  |
| Kahoot       | 5  | 1  |
| Vevox        | 3  | 2  |
| Vevox        | 3  | 5  |
| Vevox        | 6  | 6  |
| not sure     | 2  | 1  |
| Vevox        | 1  | 1  |
| Mentimeter   | 1  | 1  |
| Vevox        | 3  | 9  |
| Mentimeter   | 10 | 9  |
| Zoom polling | 1  | 1  |
| Vevox        | 2  | 2  |
| Zoom polling | 6  | 2  |
| Vevox        | 3  | 3  |
| Mentimeter   | 3  | 4  |
| Vevox        | 7  | 1  |
| Kahoot       | 5  | 8  |
| Mentimeter   | 8  | 8  |
| Zoom polling | 5  | 7  |

it: "Giving prizes to the highest ranked participants would make me more likely to take part in a







virtual mock exam "
